# Supplementary material for: Ag functionalized SnS2with enhanced photothermal activity for safe and efficient wound disinfection
Source: Royal Society of Chemistry journal article supplement (doi:10.1039/d1bm00429h), 2021-01-01
Supplement: d1bm00429h1.pdf [file d1bm00429h1.pdf]

## Supplementary information

### Ag functionalized SnS<sub>2</sub> with enhanced photothermal activity for safe and efficient wound disinfection

Jun Yang<sup>a, #</sup>, Lin Sun<sup>a, #</sup>, Shuhan Hui<sup>a</sup>, Peng Zhang<sup>a,d</sup>, Jian Li<sup>b</sup>, Dong Wang<sup>c</sup>, Xuelin Wang<sup>b, \*</sup>, Shan Jiang<sup>a, \*</sup>

<sup>a</sup>Institute of Physical Chemistry, College of Chemistry, Jilin University, Changchun 130012, P.R. China.

<sup>b</sup>Key Laboratory of Zoonosis Research, Ministry of Education, Institute of Zoonosis, College of Veterinary Medicine, Jilin University, Changchun 130062, P.R. China

<sup>c</sup>College of Chemical Engineering, Northeast Electric Power University, Jilin City 132012, P. R. China.

<sup>d</sup>Electron microscope center, Jilin University, Changchun 130012, P. R. China.

#Contributed equally

\*To whom correspondence should be addressed.

E-mail addresses: sjiang@jlu.edu.cn (Dr. Shan Jiang) and xuelin@jlu.edu.cn (Dr. Xuelin Wang)

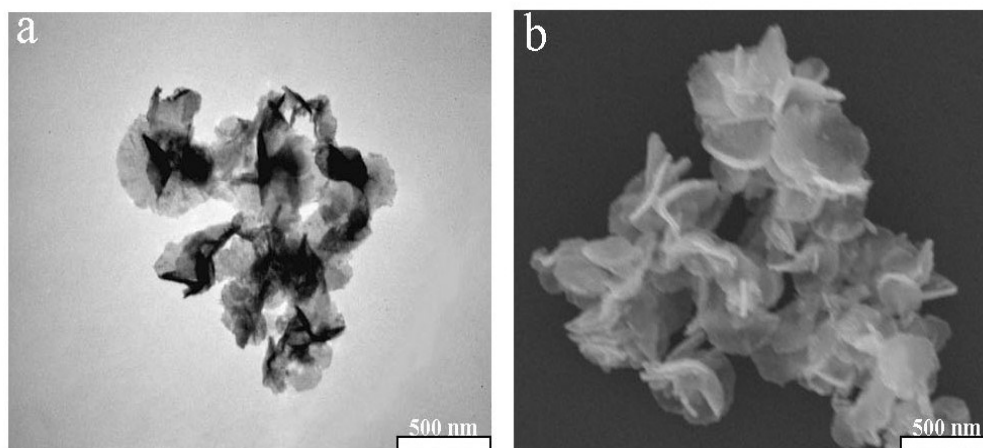

**Fig. S1** (a) TEM image and (b) SEM image of pure SnS<sub>2</sub>.

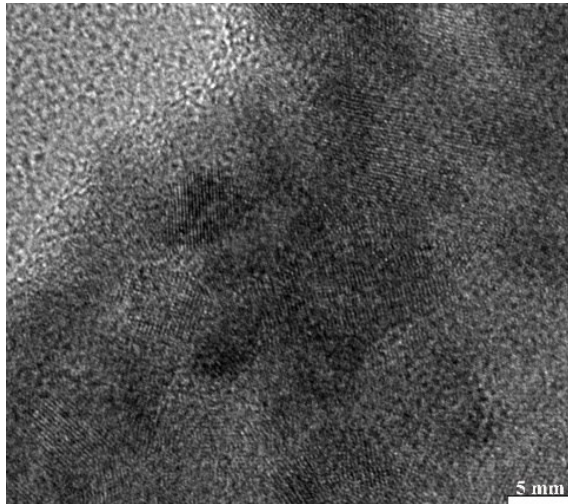

**Fig. S2** HRTEM image of Ag@SnS<sub>2</sub>.

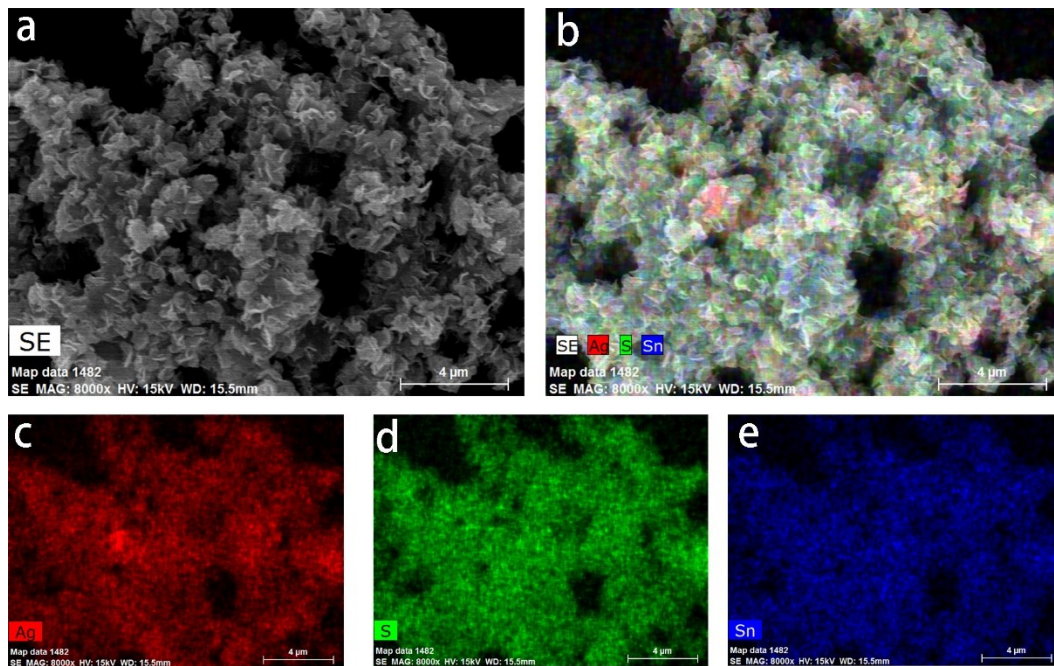

**Fig. S3** (a) SEM image of Ag@SnS<sub>2</sub> and corresponding EDS element mapping of (b) overlapped image of (c) Ag, (d) S, (e) Sn element.

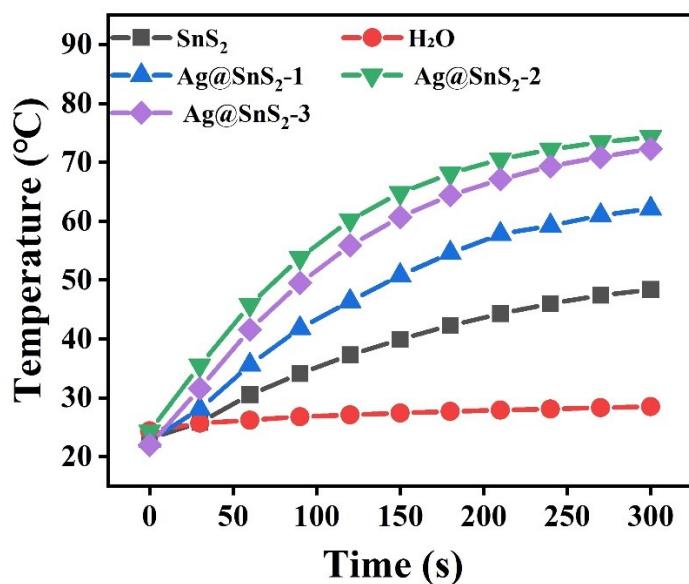

**Fig. S4** Photothermal effect of H<sub>2</sub>O and SnS<sub>2</sub>, Ag@SnS<sub>2</sub>-1, Ag@SnS<sub>2</sub>-2, Ag@SnS<sub>2</sub>-3 at 1 mg mL<sup>-1</sup> during 300 sec via 808 nm laser irradiation. 13.5, 26.9, and 33.6 mL of [Ag(NH<sub>3</sub>)<sub>2</sub>]<sup>+</sup> solution were added to 0.183 g of SnS<sub>2</sub> with the feeding mass ratio of SnS<sub>2</sub> and Ag as 1:0.4, 1:0.8, and 1:1, respectively, which were named as Ag@SnS<sub>2</sub>-1, Ag@SnS<sub>2</sub>-2, and Ag@SnS<sub>2</sub>-3.

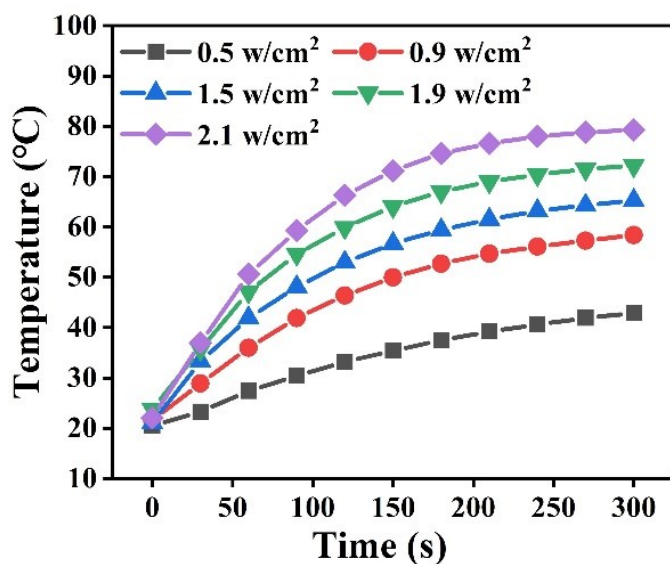

**Fig. S5** Photothermal curves of Ag@SnS<sub>2</sub> (1 mg mL<sup>-1</sup>) at different power densities (0.5, 0.9, 1.5, 1.9, and 2.1 W cm<sup>-2</sup>).

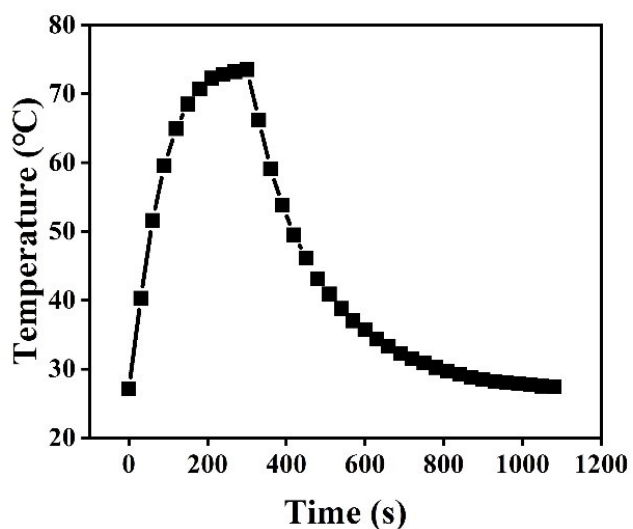

**Fig. S6** Photothermal effect of Ag@SnS<sub>2</sub> nanocomposite (1 mg mL<sup>-1</sup>) aqueous dispersion illuminated with an 808 nm laser for 5 min and in dark for 15 min.

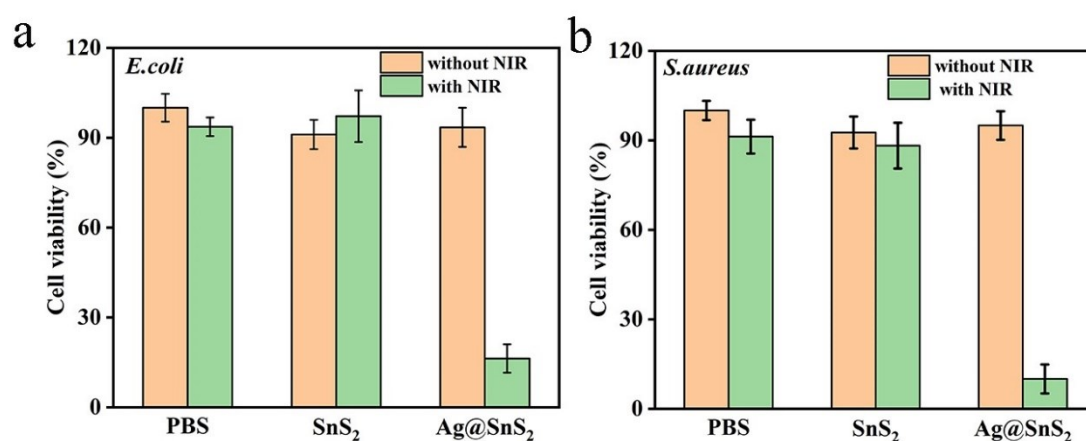

**Fig. S7** The bacterial cell viability of SnS<sub>2</sub> and Ag@SnS<sub>2</sub> at 250 μg mL<sup>-1</sup> with or without NIR irradiation for 20 min.

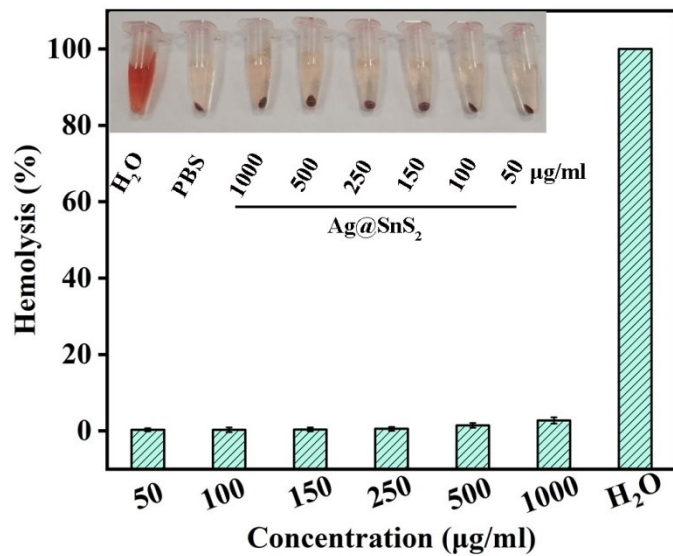

**Fig. S8** Hemolysis and photos of RBCs incubated with H<sub>2</sub>O, PBS, and Ag@SnS<sub>2</sub> at different concentrations of 50, 100, 150, 250, 500, 1000 µg mL<sup>-1</sup>. 200 µL of serum was mixed with 800 µL of samples and then incubated for 3 h at 37 °C. After centrifugation at 12000 rpm, the absorbance of the supernatants was monitored at 570 nm. PBS as the negative control and H<sub>2</sub>O as the positive control.
